# Supplementary material for: Auxiliary ligand-assisted structural diversities of three metal–organic frameworks with potassium 1H-1,2,3-triazole-4,5-dicarboxylic acid: syntheses, crystal structures and luminescence properties
Source: Royal Society of Chemistry journal article supplement (doi:10.1039/c3ce26854c), 2013-01-01
Supplement: c3ce26854c.pdf [file c3ce26854c.pdf]

## Supporting Information

5

### **Auxiliary Ligands-Assisted Structural Diversity of Three Metal-Organic Frameworks Assembled by Potassium 1*H*-1,2,3-Triazole-4,5-Dicarboxylic Acid: Syntheses, Crystal Structures and Luminescence Properties**

10

Ji-Yong Zou,<sup>a</sup> Hong-Ling Gao,<sup>\*a</sup> Wei Shi,<sup>b</sup> Jian-Zhong Cui<sup>\*a</sup> and Peng Cheng<sup>b</sup>

15

20

25

30

35

## 1. Thermogravimetric analysis

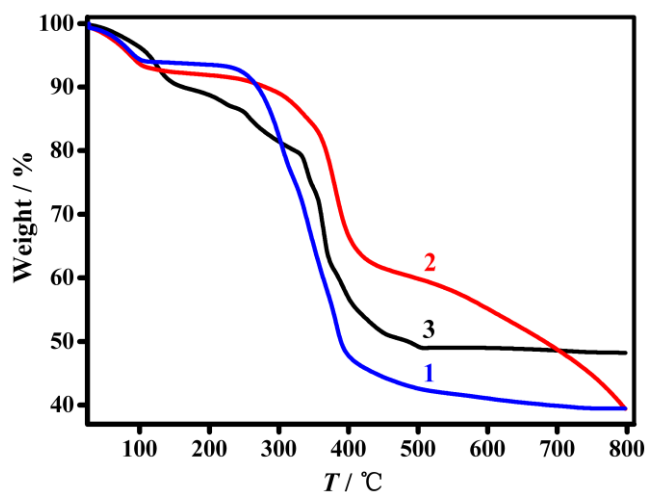

5

Fig. S1 The thermal gravimetric analysis (TGA) data of 1-3.

## 2. Power X-Ray diffraction

Powder X-ray diffraction measurements were recorded on a D/Max-2500 X-ray diffractometer using Cu/K $\alpha$  radiation.

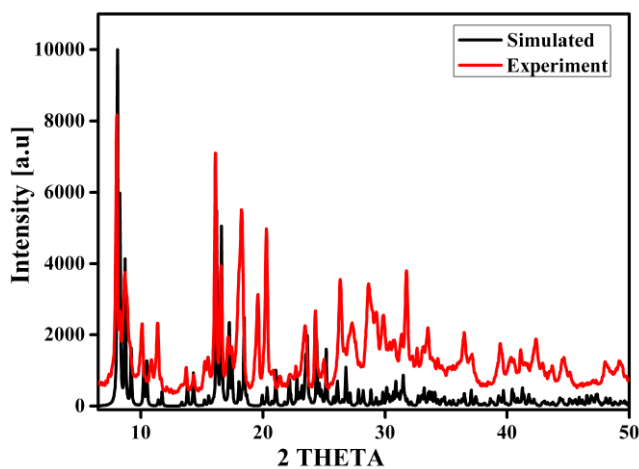

10

Fig. S2 Comparison of the experimental PXRD pattern of as-synthesized 1 with the one simulated from its single crystal structure.

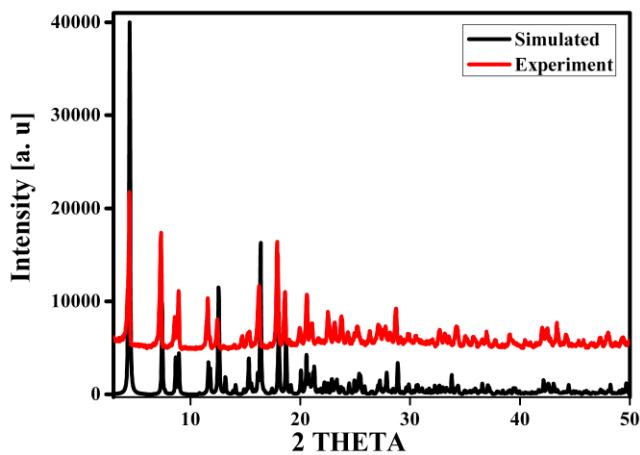

Fig. S3 Comparison of the experimental PXR D pattern of as-synthesized 2 with the one simulated from its single crystal structure

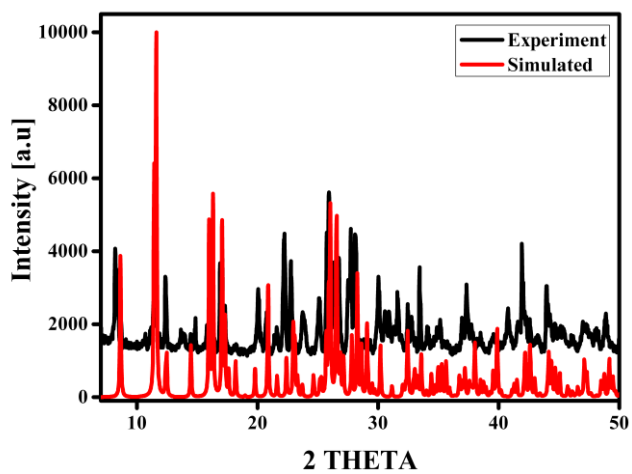

Fig. S4 Comparison of the experimental PXR D pattern of as-synthesized 3 with the one simulated from its single crystal structure

### 3. Infrared spectra

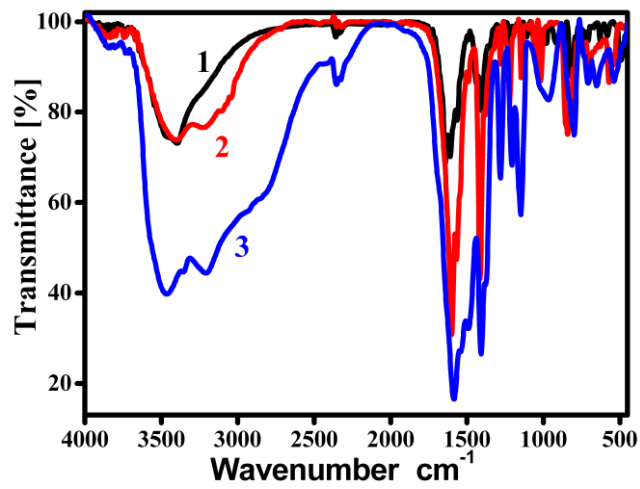

Fig. S5 IR spectra of 1-3

### 4. Crystal Structures

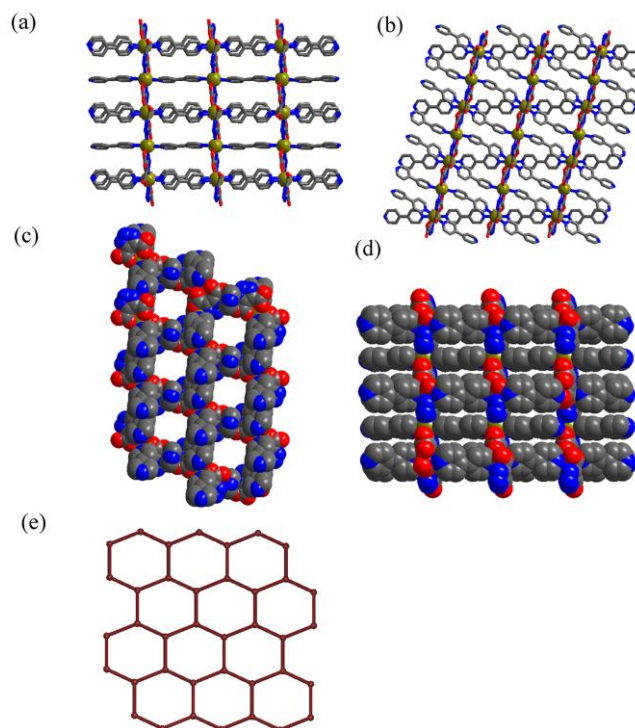

**Fig. S6** View of the 3D structure of **1** along (a) the  $[0, 1, 0]$  direction, (b) the  $[0, 0, 1]$  direction, (c) the space filling of **1** viewed along the  $[1, 0, 0]$  direction and (d) the  $[0, 1, 0]$  direction, (e) the **hcb** layers.

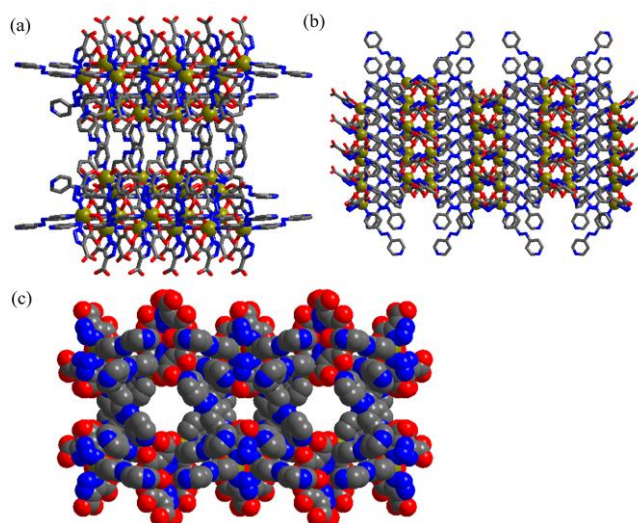

**Fig. S7** View of the 3D structure of **2** along (a) the  $[1, 0, 0]$  direction, (b) the  $[0, 1, 0]$  direction, (c) the space filling of **2** viewed along the  $[0, 0, 1]$  direction.

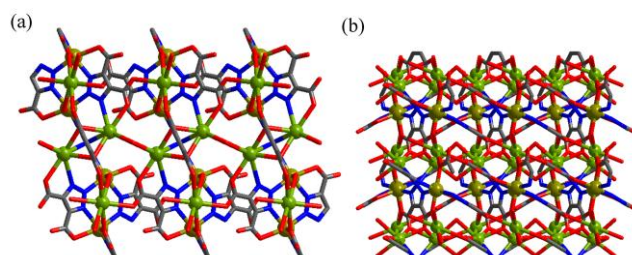

**Fig. S8** View of the 3D structure of **3** along (a) the  $[0, 1, 0]$  direction, (b) the  $[0, 0, 1]$  direction.

**Table S1** Selected bonds length and angles for MOFs **1-3**

| <b>1</b>                                     |            |                                              |            |
|----------------------------------------------|------------|----------------------------------------------|------------|
| Zn(1)-O(1)                                   | 2.113(3)   | N(6)-Zn(1)-N(6) <sup>#1</sup>                | 180.0      |
| Zn(1)-O(1) <sup>#1</sup>                     | 2.113(3)   | N(1) <sup>#2</sup> -Zn(2)-N(1)               | 180.0      |
| Zn(1)-O(3)                                   | 2.091(3)   | N(1) <sup>#2</sup> -Zn(2)-O(2)               | 101.61(13) |
| Zn(1)-O(3) <sup>#1</sup>                     | 2.091(3)   | N(1)-Zn(2)-O(2)                              | 78.39(13)  |
| Zn(1)-N(6)                                   | 2.149(4)   | N(1) <sup>#2</sup> -Zn(2)-O(2) <sup>#2</sup> | 78.39(13)  |
| Zn(1)-N(6) <sup>#1</sup>                     | 2.149(4)   | N(1)-Zn(2)-O(2) <sup>#2</sup>                | 101.61(13) |
| Zn(2)-O(2)                                   | 2.132(3)   | O(2)-Zn(2)-O(2) <sup>#2</sup>                | 180.0      |
| Zn(2)-O(2) <sup>#2</sup>                     | 2.132(3)   | N(1) <sup>#2</sup> -Zn(2)-N(4) <sup>#2</sup> | 90.12(14)  |
| Zn(2)-N(1)                                   | 2.057(4)   | N(1)-Zn(2)-N(4) <sup>#2</sup>                | 89.88(14)  |
| Zn(2)-N(1) <sup>#2</sup>                     | 2.057(4)   | O(2)-Zn(2)-N(4) <sup>#2</sup>                | 94.11(14)  |
| Zn(2)-N(4)                                   | 2.219(4)   | O(2) <sup>#2</sup> -Zn(2)-N(4) <sup>#2</sup> | 85.90(14)  |
| Zn(2)-N(4) <sup>#2</sup>                     | 2.219(4)   | N(1) <sup>#2</sup> -Zn(2)-N(4)               | 89.88(14)  |
| Zn(3)-O(4)                                   | 2.129(3)   | N(1)-Zn(2)-N(4)                              | 90.12(14)  |
| Zn(3)-O(4) <sup>#3</sup>                     | 2.129(3)   | O(2)-Zn(2)-N(4)                              | 85.89(14)  |
| Zn(3)-N(3)                                   | 2.080(4)   | O(2) <sup>#2</sup> -Zn(2)-N(4)               | 94.10(14)  |
| Zn(3)-N(3) <sup>#3</sup>                     | 2.080(4)   | N(4) <sup>#2</sup> -Zn(2)-N(4)               | 180.0(2)   |
| Zn(3)-N(5)                                   | 2.176(4)   | N(3)-Zn(3)-N(3) <sup>#3</sup>                | 180.0      |
| Zn(3)-N(5) <sup>#3</sup>                     | 2.176(4)   | N(3)-Zn(3)-O(4) <sup>#3</sup>                | 101.56(14) |
| O(3) <sup>#1</sup> -Zn(1)-O(3)               | 180.00(19) | N(3) <sup>#3</sup> -Zn(3)-O(4) <sup>#3</sup> | 78.44(14)  |
| O(3) <sup>#1</sup> -Zn(1)-O(1)               | 87.19(13)  | N(3)-Zn(3)-O(4)                              | 78.44(14)  |
| O(3)-Zn(1)-O(1)                              | 92.81(13)  | N(3) <sup>#3</sup> -Zn(3)-O(4)               | 101.55(14) |
| O(3) <sup>#1</sup> -Zn(1)-O(1) <sup>#1</sup> | 92.81(13)  | O(4) <sup>#3</sup> -Zn(3)-O(4)               | 180.0      |
| O(3)-Zn(1)-O(1) <sup>#1</sup>                | 87.19(13)  | N(3)-Zn(3)-N(5)                              | 90.72(15)  |
| O(1)-Zn(1)-O(1) <sup>#1</sup>                | 180.0      | N(3) <sup>#3</sup> -Zn(3)-N(5)               | 89.28(15)  |
| O(3) <sup>#1</sup> -Zn(1)-N(6)               | 86.87(14)  | O(4) <sup>#3</sup> -Zn(3)-N(5)               | 91.77(15)  |
| O(3)-Zn(1)-N(6)                              | 93.13(14)  | O(4)-Zn(3)-N(5)                              | 88.23(15)  |
| O(1)-Zn(1)-N(6)                              | 90.37(13)  | N(3)-Zn(3)-N(5) <sup>#3</sup>                | 89.28(15)  |
| O(1) <sup>#1</sup> -Zn(1)-N(6)               | 89.63(13)  | N(3) <sup>#3</sup> -Zn(3)-N(5) <sup>#3</sup> | 90.72(15)  |
| O(3) <sup>#1</sup> -Zn(1)-N(6) <sup>#1</sup> | 93.13(14)  | O(4) <sup>#3</sup> -Zn(3)-N(5) <sup>#3</sup> | 88.23(15)  |
| O(3)-Zn(1)-N(6) <sup>#1</sup>                | 86.87(14)  | O(4)-Zn(3)-N(5) <sup>#3</sup>                | 91.77(15)  |
| O(1)-Zn(1)-N(6) <sup>#1</sup>                | 89.63(13)  | N(5)-Zn(3)-N(5) <sup>#3</sup>                | 180.0      |
| O(1) <sup>#1</sup> -Zn(1)-N(6) <sup>#1</sup> | 90.37(13)  |                                              |            |
| <b>2</b>                                     |            |                                              |            |
| Zn(1)-O(4)                                   | 2.123(5)   | O(5)-Zn(1)-N(3)                              | 166.5(2)   |
| Zn(1)-O(5)                                   | 2.130(5)   | O(3)#1-Zn(2)-O(2)#1                          | 92.9(2)    |
| Zn(1)-O(9)                                   | 2.108(5)   | O(3)#1-Zn(2)-O(1)                            | 174.54(19) |
| Zn(1)-N(3)                                   | 2.169(6)   | O(2)#1-Zn(2)-O(1)                            | 88.3(2)    |
| Zn(1)-N(4)                                   | 2.119(6)   | O(3)#1-Zn(2)-N(1)                            | 97.6(2)    |
| Zn(1)-N(7)                                   | 2.110(6)   | O(2)#1-Zn(2)-N(1)                            | 95.4(2)    |
| Zn(2)-O(1)                                   | 2.125(5)   | O(1)-Zn(2)-N(1)                              | 76.9(2)    |
| Zn(2)-O(2)#1                                 | 2.109(5)   | O(3)#1-Zn(2)-N(16)#2                         | 93.7(2)    |
| Zn(2)-O(3)#1                                 | 2.054(5)   | O(2)#1-Zn(2)-N(16)#2                         | 82.9(2)    |
| Zn(2)-N(1)                                   | 2.138(6)   | O(1)-Zn(2)-N(16)#2                           | 91.7(2)    |
| Zn(2)-N(12)#3                                | 2.211(6)   | N(1)-Zn(2)-N(16)#2                           | 168.6(2)   |
| Zn(2)-N(16)#2                                | 2.147(6)   | O(3)#1-Zn(2)-N(12)#3                         | 89.4(2)    |
| Zn(3)-O(6)#1                                 | 2.048(5)   | O(2)#1-Zn(2)-N(12)#3                         | 170.7(2)   |
| Zn(3)-O(7)#1                                 | 2.091(5)   | O(1)-Zn(2)-N(12)#3                           | 90.3(2)    |
| Zn(3)-O(8)                                   | 2.110(5)   | N(1)-Zn(2)-N(12)#3                           | 93.2(2)    |
| Zn(3)-N(6)                                   | 2.161(6)   | N(16)#2-Zn(2)-N(12)#3                        | 87.9(2)    |
| Zn(3)-N(9)                                   | 2.213(6)   | O(6)#1-Zn(3)-O(7)#1                          | 94.23(19)  |
| Zn(3)-N(13)                                  | 2.155(6)   | O(6)#1-Zn(3)-O(8)                            | 171.57(19) |
| O(9)-Zn(1)-N(7)                              | 175.6(2)   | O(7)#1-Zn(3)-O(8)                            | 87.5(2)    |
| O(9)-Zn(1)-N(4)                              | 85.1(2)    | O(6)#1-Zn(3)-N(13)                           | 94.1(2)    |
| N(7)-Zn(1)-N(4)                              | 95.8(2)    | O(7)#1-Zn(3)-N(13)                           | 82.6(2)    |
| O(9)-Zn(1)-O(4)                              | 87.1(2)    | O(8)-Zn(3)-N(13)                             | 94.3(2)    |
| N(7)-Zn(1)-O(4)                              | 92.7(2)    | O(6)#1-Zn(3)-N(6)                            | 95.1(2)    |
| N(4)-Zn(1)-O(4)                              | 167.7(2)   | O(7)#1-Zn(3)-N(6)                            | 99.3(2)    |
| O(9)-Zn(1)-O(5)                              | 88.1(2)    | O(8)-Zn(3)-N(6)                              | 76.5(2)    |
| N(7)-Zn(1)-O(5)                              | 96.4(2)    | N(13)-Zn(3)-N(6)                             | 170.4(2)   |
| N(4)-Zn(1)-O(5)                              | 77.2(2)    | O(6)#1-Zn(3)-N(9)                            | 93.0(2)    |
| O(4)-Zn(1)-O(5)                              | 92.95(18)  | O(7)#1-Zn(3)-N(9)                            | 167.9(2)   |
| O(9)-Zn(1)-N(3)                              | 83.1(2)    | O(8)-Zn(3)-N(9)                              | 86.7(2)    |
| N(7)-Zn(1)-N(3)                              | 92.6(2)    | N(13)-Zn(3)-N(9)                             | 87.2(2)    |
| N(4)-Zn(1)-N(3)                              | 112.0(2)   | N(6)-Zn(3)-N(9)                              | 89.7(2)    |
| O(4)-Zn(1)-N(3)                              | 76.5(2)    |                                              |            |

Symmetry transformations used to generate equivalent atoms:

#1 -x,-y,-z+1 #2 -x,-y-1,-z+1 #3 -x,-y,-z

#1  $x, -y+3/2, z-1/2$  #2  $x-1/2, -y+2, -z+1/2$  #3  $-x, -y+2, -z+2$

3

|                                |            |                                              |            |
|--------------------------------|------------|----------------------------------------------|------------|
| Cd(1)-O(1)                     | 2.498(4)   | O(9)-K(1)-O(4) <sup>#6</sup>                 | 84.60(9)   |
| Cd(1)-O(5)                     | 2.301(4)   | O(6)-K(1)-O(6) <sup>#3</sup>                 | 60.93(15)  |
| Cd(1)-O(7)                     | 2.243(5)   | O(9)-K(1)-O(6) <sup>#3</sup>                 | 107.85(9)  |
| Cd(1)-N(1)                     | 2.314(4)   | O(4) <sup>#6</sup> -K(1)-O(6) <sup>#3</sup>  | 154.21(13) |
| Cd(1)-N(2) <sup>#1</sup>       | 2.285(5)   | O(6)-K(1)-O(8)                               | 114.76(13) |
| Cd(1)-N(4)                     | 2.260(4)   | O(9)-K(1)-O(8)                               | 76.63(14)  |
| K(1)-O(4) <sup>#6</sup>        | 2.807(4)   | O(4) <sup>#6</sup> -K(1)-O(8)                | 80.49(9)   |
| K(1)-O(6) <sup>#3</sup>        | 2.861(5)   | O(6) <sup>#3</sup> -K(1)-O(8)                | 80.64(10)  |
| K(1)-O(8)                      | 2.970(4)   | O(6)-K(1)-N(5) <sup>#8</sup>                 | 75.22(11)  |
| K(1)-O(9) <sup>#7</sup>        | 2.805(4)   | O(9)-K(1)-N(5) <sup>#8</sup>                 | 86.11(11)  |
| K(1)-O(6)                      | 2.754(5)   | O(4) <sup>#6</sup> -K(1)-N(5) <sup>#8</sup>  | 130.72(11) |
| K(1)-N(3) <sup>#6</sup>        | 3.106(5)   | O(6) <sup>#3</sup> -K(1)-N(5) <sup>#8</sup>  | 73.78(11)  |
| K(1)-N(5) <sup>#8</sup>        | 3.102(5)   | O(8)-K(1)-N(5) <sup>#8</sup>                 | 142.95(7)  |
| K(2)-O(3) <sup>#9</sup>        | 2.908(4)   | O(6)-K(1)-N(3) <sup>#6</sup>                 | 80.67(13)  |
| K(2)-O(3) <sup>#10</sup>       | 2.908(4)   | O(9)-K(1)-N(3) <sup>#6</sup>                 | 102.63(12) |
| K(2)-O(5) <sup>#6</sup>        | 2.818(4)   | O(4) <sup>#6</sup> -K(1)-N(3) <sup>#6</sup>  | 55.93(12)  |
| K(2)-O(5)                      | 2.818(4)   | O(6) <sup>#3</sup> -K(1)-N(3) <sup>#6</sup>  | 137.40(13) |
| O(7)-Cd(1)-N(4)                | 99.16(17)  | O(8)-K(1)-N(3) <sup>#6</sup>                 | 135.99(10) |
| O(7)-Cd(1)-N(2) <sup>#1</sup>  | 83.4(2)    | N(5) <sup>#8</sup> -K(1)-N(3) <sup>#6</sup>  | 79.44(10)  |
| N(4)-Cd(1)-N(2) <sup>#1</sup>  | 100.01(16) | O(5)-K(2)-O(5) <sup>#6</sup>                 | 180.0      |
| O(7)-Cd(1)-O(5)                | 170.13(18) | O(5)-K(2)-O(3) <sup>#9</sup>                 | 70.11(11)  |
| N(4)-Cd(1)-O(5)                | 72.74(14)  | O(5) <sup>#6</sup> -K(2)-O(3) <sup>#9</sup>  | 109.88(11) |
| N(2) <sup>#1</sup> -Cd(1)-O(5) | 103.32(15) | O(5)-K(2)-O(3) <sup>#10</sup>                | 109.89(11) |
| O(7)-Cd(1)-N(1)                | 98.20(16)  | O(5) <sup>#6</sup> -K(2)-O(3) <sup>#10</sup> | 70.11(11)  |
| N(4)-Cd(1)-N(1)                | 157.48(17) | O(3) <sup>#9</sup> -K(2)-O(3) <sup>#10</sup> | 180.0      |
| N(2) <sup>#1</sup> -Cd(1)-N(1) | 96.13(15)  | O(5)-K(2)-O(7) <sup>#8</sup>                 | 68.68(12)  |
| O(5)-Cd(1)-N(1)                | 88.37(14)  | O(5) <sup>#6</sup> -K(2)-O(7) <sup>#8</sup>  | 111.33(12) |
| O(7)-Cd(1)-O(1)                | 96.79(18)  | O(3) <sup>#9</sup> -K(2)-O(7) <sup>#8</sup>  | 109.27(11) |
| N(4)-Cd(1)-O(1)                | 94.61(14)  | O(3) <sup>#10</sup> -K(2)-O(7) <sup>#8</sup> | 70.73(12)  |
| N(2) <sup>#1</sup> -Cd(1)-O(1) | 165.17(13) | O(5)-K(2)-O(7) <sup>#1</sup>                 | 111.32(12) |
| O(5)-Cd(1)-O(1)                | 78.61(14)  | O(5) <sup>#6</sup> -K(2)-O(7) <sup>#1</sup>  | 68.68(12)  |
| N(1)-Cd(1)-O(1)                | 69.13(14)  | O(3) <sup>#9</sup> -K(2)-O(7) <sup>#1</sup>  | 70.73(12)  |
| O(6)-K(1)-O(9)                 | 160.19(12) | O(3) <sup>#10</sup> -K(2)-O(7) <sup>#1</sup> | 109.27(11) |
| O(6)-K(1)-O(4) <sup>#6</sup>   | 112.53(13) | O(7) <sup>#8</sup> -K(2)-O(7) <sup>#1</sup>  | 180.00(15) |

Symmetry transformations used to generate equivalent atoms:

#1  $-x+1, -y+1, -z+1$  #2  $x-1, y, z$  #3  $-x+3/2, y, -z+3/2$  #4  $x, y+1, z$  #5  $-x+3/2, y+1, -z+3/2$  #6  $-x+1, -y, -z+1$  #7  $-x+5/2, y, -z+3/2$  #8  $x, y-1, z$  #9  $x+1, y, z$  #10  $-x, -y, -z+1$
